# Supplementary material for: Measuring the Maturity of the Fast-Spiking Interneuron Transcriptional Program in Autism, Schizophrenia, and Bipolar Disorder
Source: PubMed Central journal article supplement (PMC3427326; doi:10.1371/journal.pone.0041215), 2012-08-24
Supplement: pone.0041215.s001.pdf [file pone.0041215.s001.pdf]

Study: Autism cortex

| Index | Coeff | Std Err | p-value     |
|-------|-------|---------|-------------|
| FS    | 23.40 | 5.05    | p<0.0001*** |
| CSP   | -3.49 | 2.50    | 0.16        |
| AST   | 1.41  | 3.38    | 0.679       |

Study: Schizophrenia dorsolateral prefrontal cortex

| Index | Coeff  | Std Err | p-value     |
|-------|--------|---------|-------------|
| FS    | 165.35 | 33.30   | p<0.0001*** |
| CSP   | -12.22 | 9.36    | 0.197       |
| AST   | -6.44  | 21.47   | 0.766       |

Study: Bipolar dorsolateral prefrontal cortex

| Index | Coeff | Std Err | p-value     |
|-------|-------|---------|-------------|
| FS    | 33.04 | 5.33    | p<0.0001*** |
| CSP   | 3.28  | 2.18    | 0.138       |
| AST   | -7.52 | 3.92    | 0.060       |

FS = FS cell index

CSP = Corticospinal projection neuron index

AST = Astrocyte index

**Supplemental Table S1: Multiple regression models.** Multiple linear regression modeling was used to assess the relationship between parvalbumin levels and cell-type specific maturation indices. In all cases, the association between the FS cell index and parvalbumin expression levels remained highly significant ( $p<0.0001$ ) after the Corticospinal projection neuron index (CSP) and Astrocyte index (AST) were included as covariates in the model.
