# Supplementary material for: Measuring the Maturity of the Fast-Spiking Interneuron Transcriptional Program in Autism, Schizophrenia, and Bipolar Disorder
Source: PubMed Central journal article supplement (PMC3427326; doi:10.1371/journal.pone.0041215), 2012-08-24
Supplement: pone.0041215.s006.pdf [file pone.0041215.s006.pdf]

## Upregulated during PV development and down in DZ

### Gene symbol Gene name

|          |                                                                                       |
|----------|---------------------------------------------------------------------------------------|
| asns     | asparagine synthetase                                                                 |
| atp5a1   | ATP synthase, H+ transporting, mitochondrial F1 complex, alpha subunit, isoform 1     |
| atp6v1a  | ATPase, H+ transporting, lysosomal V1 subunit A                                       |
| atp6v1b2 | ATPase, H+ transporting, lysosomal V1 subunit B2                                      |
| atp6v1c1 | ATPase, H+ transporting, lysosomal V1 subunit C1                                      |
| atp6v1d  | ATPase, H+ transporting, lysosomal V1 subunit D                                       |
| cab39    | calcium binding protein 39                                                            |
| cckbr    | cholecystokinin B receptor                                                            |
| chgb     | chromogranin B                                                                        |
| cse1l    | chromosome segregation 1-like ( <i>S. cerevisiae</i> )                                |
| cul3     | cullin 3                                                                              |
| dctn3    | dynactin 3                                                                            |
| ddx1     | DEAD (Asp-Glu-Ala-Asp) box polypeptide 1                                              |
| dlat     | dihydrolipoamide S-acetyltransferase (E2 component of pyruvate dehydrogenase complex) |
| dld      | dihydrolipoamide dehydrogenase                                                        |
| dlg3     | discs, large homolog 3 ( <i>Drosophila</i> )                                          |
| dnm1l    | dynamamin 1-like                                                                      |
| ebna1bp2 | EBNA1 binding protein 2                                                               |
| eps15    | epidermal growth factor receptor pathway substrate 15                                 |
| gad1     | glutamic acid decarboxylase 1                                                         |
| gad2     | glutamic acid decarboxylase 2                                                         |
| grsf1    | G-rich RNA sequence binding factor 1                                                  |
| iars     | isoleucine-tRNA synthetase                                                            |
| idh3a    | isocitrate dehydrogenase 3 (NAD+) alpha                                               |
| idh3b    | isocitrate dehydrogenase 3 (NAD+) beta                                                |
| immt     | inner membrane protein, mitochondrial                                                 |
| kcnab1   | potassium voltage-gated channel, shaker-related subfamily, beta member 1              |
| klhdc2   | kelch domain containing 2                                                             |
| lrpprc   | leucine-rich PPR-motif containing                                                     |
| map2k1   | mitogen activated protein kinase kinase 1                                             |
| mapk10   | mitogen activated protein kinase 10                                                   |
| mapk9    | mitogen activated protein kinase 9                                                    |
| mat2b    | methionine adenosyltransferase II, beta                                               |
| mdh1     | malate dehydrogenase 1, NAD (soluble)                                                 |
| mtx2     | metaxin 2                                                                             |
| ndufs2   | NADH dehydrogenase (ubiquinone) Fe-S protein 2                                        |
| necap1   | NECAP endocytosis associated 1                                                        |
| nnt      | nicotinamide nucleotide transhydrogenase                                              |
| npepps   | aminopeptidase puromycin sensitive                                                    |
| nsf      | N-ethylmaleimide sensitive fusion protein                                             |
| pam      | peptidylglycine alpha-amidating monooxygenase                                         |
| pitpna   | phosphatidylinositol transfer protein, alpha                                          |
| prepl    | prolyl endopeptidase-like                                                             |
| prps1    | phosphoribosyl pyrophosphate synthetase 1                                             |
| psmd1    | proteasome (prosome, macropain) 26S subunit, non-ATPase, 1                            |
| psme3    | proteasome (prosome, macropain) 28 subunit, 3                                         |
| ptpre    | protein tyrosine phosphatase, receptor type, E                                        |
| pvalb    | parvalbumin                                                                           |
| ralb     | v-ral simian leukemia viral oncogene homolog B (ras related)                          |
| rgs4     | regulator of G-protein signaling 4                                                    |
| rnf14    | ring finger protein 14                                                                |
| rraga    | Ras-related GTP binding A                                                             |
| serpini1 | serine (or cysteine) peptidase inhibitor, clade I, member 1                           |
| sh3gl2   | SH3-domain GRB2-like 2                                                                |
| smyd2    | SET and MYND domain containing 2                                                      |
| ube2n    | ubiquitin-conjugating enzyme E2N                                                      |
| ugp2     | UDP-glucose pyrophosphorylase 2                                                       |

|        |                                                 |
|--------|-------------------------------------------------|
| uqcrc2 | ubiquinol cytochrome c reductase core protein 2 |
| vdac1  | voltage-dependent anion channel 1               |
| vsnl1  | visinin-like 1                                  |

#### Downregulated during PV development and up in DZ

| Gene symbol | Gene name                                                                                  |
|-------------|--------------------------------------------------------------------------------------------|
| acaa2       | acetyl-Coenzyme A acyltransferase 2 (mitochondrial 3-oxoacyl-Coenzyme A thiolase)          |
| ahnak       | AHNAK nucleoprotein (desmoyokin)                                                           |
| aldh2       | aldehyde dehydrogenase 2, mitochondrial                                                    |
| angptl4     | angiopoietin-like 4                                                                        |
| apoe        | apolipoprotein E                                                                           |
| bgn         | biglycan                                                                                   |
| cdkn1a      | cyclin-dependent kinase inhibitor 1A (P21)                                                 |
| csk         | c-src tyrosine kinase                                                                      |
| ddah2       | dimethylarginine dimethylaminohydrolase 2                                                  |
| ddr1        | discoidin domain receptor family, member 1                                                 |
| dpysl3      | dihydropyrimidinase-like 3                                                                 |
| eef1d       | eukaryotic translation elongation factor 1 delta (guanine nucleotide exchange protein)     |
| ephx1       | epoxide hydrolase 1, microsomal                                                            |
| fxyd1       | FXVD domain-containing ion transport regulator 1                                           |
| fyn         | Fyn proto-oncogene                                                                         |
| gnb2l1      | Guanine nucleotide binding protein (G protein), beta polypeptide 2 like 1                  |
| h2afj       | H2A histone family, member J                                                               |
| marcksl1    | MARCKS-like 1                                                                              |
| ndrg2       | N-myc downstream regulated gene 2                                                          |
| necap2      | NECAP endocytosis associated 2                                                             |
| nkiras2     | NFKB inhibitor interacting Ras-like protein 2                                              |
| nme4        | expressed in non-metastatic cells 4, protein                                               |
| ntsr2       | neurotensin receptor 2                                                                     |
| pax6        | paired box gene 6                                                                          |
| ptn         | pleiotrophin                                                                               |
| ptpn13      | protein tyrosine phosphatase, non-receptor type 13                                         |
| rab31       | RAB31, member RAS oncogene family                                                          |
| ramp1       | receptor (calcitonin) activity modifying protein 1                                         |
| rhoc        | ras homolog gene family, member C                                                          |
| rps19       | ribosomal protein S19                                                                      |
| sec61a1     | Sec61 alpha 1 subunit ( <i>S. cerevisiae</i> )                                             |
| slc3a2      | solute carrier family 3 (activators of dibasic and neutral amino acid transport), member 2 |
| tnfrsf1a    | tumor necrosis factor receptor superfamily, member 1a                                      |
| txnip       | thioredoxin interacting protein                                                            |
| ung         | uracil DNA glycosylase                                                                     |

**Supplemental table s6.** List of 95 genes that were significantly regulated in the same direction during disease and in an opposite direction during FS cell development. Genes are separated into 2 groups based on the direction of regulation.
