# Supplementary material for: Measuring the Maturity of the Fast-Spiking Interneuron Transcriptional Program in Autism, Schizophrenia, and Bipolar Disorder
Source: PubMed Central journal article supplement (PMC3427326; doi:10.1371/journal.pone.0041215), 2012-08-24
Supplement: pone.0041215.s007.pdf [file pone.0041215.s007.pdf]

Upregulated in FS cells AND downregulated in disease

| Category        | Term                                             | count | %    | PValue   | Fold Enrich | Benjamini |
|-----------------|--------------------------------------------------|-------|------|----------|-------------|-----------|
| GOTERM_BP_FAT   | *generation of precursor metabolites and energy  | 12    | 20   | 1.84E-06 | 5.92        | 0.0008    |
| GOTERM_BP_FAT   | proton transport                                 | 6     | 10   | 1.53E-05 | 16.29       | 0.0032    |
| GOTERM_BP_FAT   | hydrogen transport                               | 6     | 10   | 1.53E-05 | 16.29       | 0.0032    |
| GOTERM_CC_FAT   | proton-transporting two-sector ATPase complex, c | 5     | 8.33 | 4.00E-05 | 21.06       | 0.0051    |
| GOTERM_BP_FAT   | oxidative phosphorylation                        | 6     | 10   | 8.07E-05 | 12          | 0.0113    |
| GOTERM_BP_FAT   | ATP synthesis coupled proton transport           | 5     | 8.33 | 1.64E-04 | 15.83       | 0.0172    |
| GOTERM_BP_FAT   | energy coupled proton transport                  | 5     | 8.33 | 1.64E-04 | 15.83       | 0.0172    |
| GOTERM_BP_FAT   | *monovalent inorganic cation transport           | 8     | 13.3 | 2.04E-04 | 6.08        | 0.0171    |
| GOTERM_BP_FAT   | ion transmembrane transport                      | 5     | 8.33 | 2.33E-04 | 14.62       | 0.0162    |
| SP_PIR_KEYWORDS | Hydrogen ion transport                           | 5     | 8.33 | 2.42E-04 | 14.48       | 0.034     |
| KEGG_PATHWAY    | *Oxidative phosphorylation                       | 7     | 11.7 | 3.72E-04 | 6.51        | 0.0282    |
| GOTERM_BP_FAT   | ribonucleotide biosynthetic process              | 6     | 10   | 5.73E-04 | 8.14        | 0.034     |
| GOTERM_CC_FAT   | *mitochondrion                                   | 18    | 30   | 7.54E-04 | 2.25        | 0.0314    |

Downregulated in disease

| Category        | Term                                                | Count | %    | PValue   | Fold Enrich | Benjamini |
|-----------------|-----------------------------------------------------|-------|------|----------|-------------|-----------|
| GOTERM_BP_FAT   | *generation of precursor metabolites and energy     | 12    | 14.1 | 8.48E-05 | 4.09        | 0.048733  |
| GOTERM_BP_FAT   | proton transport                                    | 6     | 7.06 | 9.86E-05 | 11.26       | 0.028607  |
| GOTERM_BP_FAT   | hydrogen transport                                  | 6     | 7.06 | 9.86E-05 | 11.26       | 0.028607  |
| GOTERM_CC_FAT   | proton-transporting two-sector ATPase complex, c    | 5     | 5.88 | 1.64E-04 | 14.90       | 0.026806  |
| GOTERM_BP_FAT   | oxidative phosphorylation                           | 6     | 7.06 | 4.94E-04 | 8.29        | 0.092524  |
| GOTERM_BP_FAT   | ATP synthesis coupled proton transport              | 5     | 5.88 | 7.14E-04 | 10.94       | 0.099864  |
| GOTERM_BP_FAT   | energy coupled proton transport, down electroche    | 5     | 5.88 | 7.14E-04 | 10.94       | 0.099864  |
| SP_PIR_KEYWORDS | Hydrogen ion transport                              | 5     | 5.88 | 9.48E-04 | 10.22       | 0.151364  |
| GOTERM_BP_FAT   | ion transmembrane transport                         | 5     | 5.88 | 1.00E-03 | 10.10       | 0.111459  |
| GOTERM_CC_FAT   | proton-transporting two-sector ATPase complex       | 5     | 5.88 | 1.02E-03 | 9.94        | 0.081277  |
| KEGG_PATHWAY    | *Oxidative phosphorylation                          | 7     | 8.24 | 1.44E-03 | 5.15        | 0.121341  |
| GOTERM_MF_FAT   | proton-transporting ATPase activity, rotational mec | 4     | 4.71 | 2.10E-03 | 13.64       | 0.375094  |
| GOTERM_BP_FAT   | *monovalent inorganic cation transport              | 8     | 9.41 | 2.11E-03 | 4.20        | 0.187242  |
| GOTERM_MF_FAT   | cofactor binding                                    | 8     | 9.41 | 2.88E-03 | 3.98        | 0.275862  |
| GOTERM_BP_FAT   | ribonucleotide biosynthetic process                 | 6     | 7.06 | 3.21E-03 | 5.63        | 0.237204  |
| GOTERM_CC_FAT   | *mitochondrion                                      | 21    | 24.7 | 3.95E-03 | 1.86        | 0.196724  |

Upregulated in FS cells

| Category        | Term                                            | Count | %    | PValue   | Fold Enrich | Benjamini |
|-----------------|-------------------------------------------------|-------|------|----------|-------------|-----------|
| GOTERM_CC_FAT   | *mitochondrion                                  | 171   | 16.7 | 9.73E-08 | 1.31        | 0.0000    |
| SP_PIR_KEYWORDS | mitochondrion                                   | 112   | 11   | 1.57E-06 | 1.37        | 0.0008    |
| SP_PIR_KEYWORDS | transport                                       | 171   | 16.7 | 7.57E-05 | 1.22        | 0.0180    |
| GOTERM_CC_FAT   | mitochondrial part                              | 84    | 8.22 | 1.96E-04 | 1.33        | 0.0459    |
| GOTERM_BP_FAT   | cofactor metabolic process                      | 34    | 3.33 | 2.42E-04 | 1.61        | 0.5147    |
| KEGG_PATHWAY    | *Oxidative phosphorylation                      | 26    | 2.54 | 3.47E-04 | 1.70        | 0.0609    |
| GOTERM_BP_FAT   | *generation of precursor metabolites and energy | 52    | 5.09 | 3.66E-04 | 1.44        | 0.4208    |
| GOTERM_BP_FAT   | cation transport                                | 57    | 5.58 | 3.69E-04 | 1.41        | 0.3069    |
| UP_SEQ_FEATURE  | Mitochondrion                                   | 69    | 6.75 | 3.71E-04 | 1.36        | 0.6305    |
| SP_PIR_KEYWORDS | transit peptide                                 | 69    | 6.75 | 6.30E-04 | 1.34        | 0.0962    |
| GOTERM_BP_FAT   | *monovalent inorganic cation transport          | 36    | 3.52 | 6.81E-04 | 1.53        | 0.3983    |

**Supplemental table s7.** Top chart is pathway analysis using DAVID of the 60 genes that were upregulated during FS cell development and downregulated in autism, bipolar disorder, and schizophrenia. Middle chart is pathway analysis using DAVID of 85 genes downregulated in autism, bipolar, and schizophrenia. Bottom chart is pathway analysis using DAVID of the 1023 genes that were upregulated in FS cells over development. Pathways enriched in all are starred.
