# Supplementary material for: Measuring the Maturity of the Fast-Spiking Interneuron Transcriptional Program in Autism, Schizophrenia, and Bipolar Disorder
Source: PLOS journal article supplement (doi:10.1371/journal.pone.0041215), 2012-08-24
Supplement: S5 (10.1371/journal.pone.0041215.s005) [file journal.pone.0041215.s005]

|                                     |                   |                     |
|-------------------------------------|-------------------|---------------------|
| <u>Up FS cell development</u>       | <u>Up ASD</u>     | <u>Down ASD</u>     |
| <u>Down FS cell development</u>     | 438(20.6%)        | 574(27.0%)          |
|                                     | 620(29.2%)        | 491(23.1%)          |
| <u>Up FS cell development</u>       | <u>Up SCZ</u>     | <u>Down SCZ</u>     |
| <u>Down FS cell development</u>     | 459(21.6%)        | 597(28.1%)          |
|                                     | 599(28.2%)        | 468(22.1%)          |
| <u>Up FS cell development</u>       | <u>Up BPD</u>     | <u>Down BPD</u>     |
| <u>Down FS cell development</u>     | 500(23.5%)        | 623(29.4%)          |
|                                     | 558(26.3%)        | 442(20.8%)          |
| <u>Sig up FS cell development</u>   | <u>Sig up ASD</u> | <u>Sig down ASD</u> |
| <u>Sig down FS cell development</u> | 51(14.0%)         | 104(28.6%)          |
|                                     | 151(41.5%)        | 58(15.9%)           |
| <u>Sig up FS cell development</u>   | <u>Sig up SCZ</u> | <u>Sig down SCZ</u> |
| <u>Sig down FS cell development</u> | 31(14.0%)         | 59(26.6%)           |
|                                     | 94(42.3%)         | 38(17.1%)           |
| <u>Sig up FS cell development</u>   | <u>Sig up BPD</u> | <u>Sig down BPD</u> |
| <u>Sig down FS cell development</u> | 50(18.4%)         | 73(26.8%)           |
|                                     | 105(38.6%)        | 44(16.2%)           |

**Supplemental table S5. Chi-square analysis.** For sub-tables 1-3, all genes were divided into 4 groups (up during FS cell development/up in disease; up during FS cell development/down in disease; down during FS cell development/up in disease; down during FS cell development/down in disease). Values were entered into an online chi-square 2x2 contingency table that used the Fisher's exact test for calculation of p-values. In all cases, genes expression levels in the presence of disease changed in the opposite direction from that occurring during FS cell development ( $p < 0.0001$ ). For sub-tables 4-6, only genes that were significantly change in disease and during development were used. In all cases results remained highly significant ( $p < 0.0001$ ).
