# Supplementary material for: Measuring the Maturity of the Fast-Spiking Interneuron Transcriptional Program in Autism, Schizophrenia, and Bipolar Disorder
Source: PLoS One. 2012 Aug 24;7(8):e41215. doi: 10.1371/journal.pone.0041215 (PMC3427326; doi:10.1371/journal.pone.0041215)
Supplement: Table S3 — Simple linear regression models with interneuron markers. Simple linear regression was performed with the FS cell index as the dependent variable. There was a significant positive correlation between parvalubmin expression levels and the FS cell index in all studies. The FS cell index was also positively correlated with CCK and VIP levels in all studies. Calretinin was negatively correlated with the FS cell index in the autism and bipolar studies. (PDF) [file pone.0041215.s003.pdf]

Study: Autism cortex

| <u>Index</u> | <u>Coeff</u> | <u>Std Err</u> | <u>p-value</u> |
|--------------|--------------|----------------|----------------|
| PVALB        | 0.015        | 0.002          | <0.0001***     |
| CALR         | -0.080       | 0.012          | <0.0001***     |
| CCK          | 0.010        | 0.003          | 0.0003***      |
| SSTR1        | 0.005        | 0.008          | 0.5503         |
| VIP          | 0.008        | 0.002          | <0.0001***     |

Study: Schizophrenia dorsolateral prefrontal cortex

| <u>Index</u> | <u>Coeff</u> | <u>Std Err</u> | <u>p-value</u> |
|--------------|--------------|----------------|----------------|
| PVALB        | 0.002        | 0.0004         | <0.0001***     |
| CALR         | 0.001        | 0.006          | 0.9016         |
| CCK          | 0.008        | 0.001          | <0.0001***     |
| SSTR1        | 0.004        | 0.002          | 0.0567         |
| VIP          | 0.003        | 0.001          | 0.0011***      |

Study: Bipolar dorsolateral prefrontal cortex

| <u>Index</u> | <u>Coeff</u> | <u>Std Err</u> | <u>p-value</u> |
|--------------|--------------|----------------|----------------|
| PVALB        | 0.014        | 0.002          | <0.0001***     |
| CALR         | -0.039       | 0.009          | 0.0001***      |
| CCK          | 0.016        | 0.003          | <0.0001***     |
| SSTR1        | 0.017        | 0.017          | 0.3193         |
| VIP          | 0.047        | 0.010          | <0.0001***     |

PVALB = parvalbumin

CALR = calretinin

CCK = cholecystokinin

SSTR1 = somatostatin

VIP = vasoactive intestinal peptide

### **Supplemental Table S3: Simple linear regression models with interneuron**

**markers.** Simple linear regression was performed with the FS cell index as the dependent variable. There was a significant positive correlation between parvalbumin expression levels and the FS cell index in all studies. The FS cell index was also positively correlated with CCK and VIP levels in all studies. Calretinin was negatively correlated with the FS cell index in the autism and bipolar studies.
